# Supplementary material for: Forgetting or Blanking? Evaluating the Role of a Forgot Option in a Thought Sampling Method for Mind Blanking Research
Source: Research Square preprint supplement (doi:10.21203/rs.3.rs-7901887/v1), 2025-11-06
Supplement: Supplementary file 1 [file fde0d401af158f5b2648f5c6.docx]

**SUPPLEMENTARY MATERIAL**

**Linear mixed-effects model results for behavioral performance**

This section presents the full fixed-effect estimates from three linear mixed-effects models examining the effects of State, Session, and Option and their interactions on behavioral outcomes. The dependent variables were:

- the hit RT: mean correct-response reaction time (ms)
- the SD of the hit RT – within-subject standard deviation of hit RT(ms)
- d-prime – a signal detection sensitivity index

The predictor coding was:

- State: Focus, Task-related thought (TRT), External distraction (ED; reference), Mind wandering (MW), Mind blanking (MB), and Forgot (Fgt)
- Session: First (reference) and Second
- Options: five-option (reference) and six-option

The model performance indices, i.e., the marginal R², the conditional R², the intraclass coefficient (ICC), and the root mean square error (RMSE) are reported in the Note of each table. These values quantify the proportion of variance explained by fixed effects alone (marginal R²) and by the full model including random effects (conditional R²), the ICC, and the RMSE in the original measurement units.

**Table S1.** Fixed effects from the linear mixed-effects model predicting the hit RT values

| **Predictor** | **Estimate** | **SE** | **df** | **t** | **p** |
| --- | --- | --- | --- | --- | --- |
| (Intercept) | 414.25 | 7.99 | 447.38 | 51.85 | <0.001*** |
| Focus | 6.07 | 5.38 | 7874.00 | 1.13 | 0.259 |
| TRT | 12.56 | 5.91 | 7865.42 | 2.13 | 0.033* |
| MW | 1.62 | 6.78 | 7846.92 | 0.24 | 0.811 |
| MB | 9.71 | 6.50 | 7855.91 | 1.49 | 0.135 |
| Fgt | −15.03 | 10.72 | 7838.15 | −1.40 | 0.161 |
| Second | 18.33 | 11.47 | 449.43 | 1.60 | 0.111 |
| 6-option | 10.27 | 11.51 | 456.51 | 0.89 | 0.373 |
| Focus × Second | −23.83 | 7.76 | 7867.44 | −3.07 | 0.002** |
| TRT × Second | −30.09 | 8.45 | 7853.78 | −3.56 | <0.001*** |
| MW × Second | −12.11 | 9.66 | 7845.53 | −1.25 | 0.210 |
| MB × Second | −26.34 | 9.08 | 7854.46 | −2.90 | 0.004** |
| Fgt × Second | 13.72 | 12.95 | 7845.68 | 1.06 | 0.289 |
| Focus × 6-option | −10.02 | 7.75 | 7861.92 | −1.29 | 0.196 |
| TRT × 6-option | −15.20 | 8.57 | 7854.43 | −1.77 | 0.076† |
| MW × 6-option | 1.86 | 10.43 | 7843.96 | 0.18 | 0.859 |
| MB × 6-option | −15.49 | 9.43 | 7849.94 | −1.64 | 0.100 |
| Second × 6-option | −24.74 | 20.76 | 303.56 | −1.19 | 0.234 |
| Focus × Second × 6-option | 17.58 | 11.42 | 7888.85 | 1.54 | 0.124 |
| TRT × Second × 6-option | 27.01 | 12.34 | 7870.78 | 2.19 | 0.029* |
| MW × Second × 6-option | −2.39 | 14.21 | 7855.49 | −0.17 | 0.866 |
| MB × Second × 6-option | 25.87 | 13.17 | 7865.60 | 1.97 | 0.049* |

†p<0.10, *p<0.05, **p<0.01, ***p<0.001. Marginal R² = 0.004, Conditional R² = 0.502, ICC = 0.500, RMSE = 60.15 ms. SE: standard error, df: degrees of freedom.

**Table S2.** Fixed effects from the linear mixed-effects model predicting the SD of the hit RT

| **Predictor** | **Estimate** | **SE** | **df** | **t** | **p** |
| --- | --- | --- | --- | --- | --- |
| (Intercept) | 43.93 | 3.40 | 3012.59 | 12.91 | <0.001*** |
| Focus | −3.90 | 3.38 | 7712.57 | −1.16 | 0.248 |
| TRT | −0.41 | 3.71 | 7710.26 | −0.11 | 0.911 |
| MW | −3.95 | 4.26 | 7666.84 | −0.93 | 0.355 |
| MB | −0.06 | 4.09 | 7696.47 | −0.01 | 0.989 |
| Fgt | 3.90 | 6.80 | 7626.62 | 0.57 | 0.566 |
| Second | 4.93 | 4.95 | 3204.33 | 1.00 | 0.319 |
| 6-option | 2.51 | 4.95 | 3220.62 | 0.51 | 0.613 |
| Focus × Second | −3.26 | 4.93 | 7709.88 | −0.66 | 0.508 |
| TRT × Second | −2.15 | 5.38 | 7684.02 | −0.40 | 0.690 |
| MW × Second | −1.07 | 6.14 | 7659.63 | −0.17 | 0.861 |
| MB × Second | −3.72 | 5.78 | 7689.99 | −0.64 | 0.519 |
| Fgt × Second | −2.61 | 8.23 | 7661.66 | −0.32 | 0.751 |
| Focus × 6-option | −0.71 | 4.90 | 7705.15 | −0.15 | 0.885 |
| TRT × 6-option | −0.82 | 5.41 | 7688.15 | −0.15 | 0.879 |
| MW × 6-option | 4.88 | 6.59 | 7654.67 | 0.74 | 0.459 |
| MB × 6-option | −3.57 | 5.94 | 7677.93 | −0.60 | 0.548 |
| Second × 6-option | −2.08 | 7.64 | 1470.04 | −0.27 | 0.785 |
| Focus × Second × 6-option | −1.12 | 7.19 | 7691.61 | −0.16 | 0.876 |
| TRT × Second × 6-option | −3.80 | 7.80 | 7712.66 | −0.49 | 0.626 |
| MW × Second × 6-option | −4.20 | 8.99 | 7692.36 | −0.47 | 0.640 |
| MB × tSecond × 6-option | −0.09 | 8.31 | 7710.04 | −0.01 | 0.991 |

†p<0.10, *p<0.05, **p<0.01, ***p<0.0010. Marginal R² = 0.004, Conditional R² = 0.114, ICC = 0.111, RMSE = 37.43 ms.

**Table S3.** Fixed effects from the linear mixed-effects model predicting the d-prime values

| **Predictor** | **Estimate** | **SE** | **df** | **t** | **p** |
| --- | --- | --- | --- | --- | --- |
| (Intercept) | 4.83 | 0.35 | 2194.81 | 13.88 | <0.001*** |
| (Intercept) | 2.06 | 0.37 | 2383.88 | 5.54 | <0.001*** |
| Focus | 1.39 | 0.41 | 2383.67 | 3.40 | <0.001*** |
| TRT | 0.42 | 0.48 | 2371.24 | 0.86 | 0.391 |
| MW | 1.37 | 0.45 | 2393.59 | 3.07 | 0.002** |
| MB | 0.51 | 0.74 | 2359.99 | 0.69 | 0.488 |
| Fgt | 0.18 | 0.49 | 2202.42 | 0.38 | 0.705 |
| Second | 0.37 | 0.52 | 2253.14 | 0.71 | 0.479 |
| 6-option | −0.22 | 0.52 | 2382.84 | −0.41 | 0.680 |
| Focus × Second | −0.60 | 0.58 | 2390.41 | −1.05 | 0.296 |
| TRT × Second | 0.26 | 0.68 | 2375.08 | 0.39 | 0.695 |
| MW × Second | −0.95 | 0.61 | 2389.59 | −1.54 | 0.123 |
| MB × Second | −1.21 | 0.87 | 2377.80 | −1.40 | 0.163 |
| Fgt × Second | −0.28 | 0.55 | 2392.40 | −0.51 | 0.611 |
| Focus × 6-option | −0.77 | 0.61 | 2391.82 | −1.27 | 0.204 |
| TRT × 6-option | −0.19 | 0.73 | 2380.61 | −0.26 | 0.799 |
| MW × 6-option | 0.64 | 0.71 | 2393.90 | 0.90 | 0.371 |
| MB × 6-option | −0.60 | 0.73 | 1819.21 | −0.82 | 0.414 |
| Second × 6-option | 0.59 | 0.78 | 2345.66 | 0.76 | 0.445 |
| Focus × Second × 6-option | 0.95 | 0.84 | 2376.76 | 1.13 | 0.258 |
| TRT × Second × 6-option | 0.61 | 0.99 | 2391.48 | 0.62 | 0.535 |
| MW × Second × 6-option | −0.34 | 0.95 | 2380.94 | −0.36 | 0.721 |

†p<0.10, *p<0.05, **p<0.01, ***p<0.0010. Marginal R² = 0.091, Conditional R² = 0.153, ICC = 0.069, RMSE = 2.34.
